# Supplementary material for: What do we know about demand, use and outcomes in primary care out-of-hours services? A systematic scoping review of international literature
Source: PubMed Central journal article supplement — BMJ Open. 2020 Jan 19;10(1):e033481. doi: 10.1136/bmjopen-2019-033481 (PMC7045150; doi:10.1136/bmjopen-2019-033481), 2020-01-19
Supplement: bmjopen-2019-033481supp001.pdf [file bmjopen-2019-033481supp001.pdf]

**Appendix 1. Search strategies.****For Ovid: searching Medline and Embase, from 1995 onwards.**

|     |                               |
|-----|-------------------------------|
| 1.  | General practice.mp           |
| 2.  | Primary care.mp               |
| 3.  | Family medicine.mp            |
| 4.  | Family practice.mp            |
| 5.  | #1 OR #2 OR #3 OR #4          |
| 6.  | Out of hours.mp               |
| 7.  | Out-of-hours.mp               |
| 8.  | #6 OR #7                      |
| 9.  | Urgent care.mp                |
| 10. | Unscheduled care.mp           |
| 11. | #8 OR #9 OR #10               |
| 12. | #5 AND #11                    |
| 13. | Duplicates removed from #12   |
| 14. | Limit #13 to English language |

**For EBSCOHost: searching CINAHL, Medline, PsychARTILES, PsychINFO, SocINDEX with FULLTEXT, from 1995 onwards/**

|    |                                                                                      |
|----|--------------------------------------------------------------------------------------|
| 1. | [General practice OR primary care] AND [Out of hours OR Out-of-hours OR Urgent care] |
| 2. | Limit #1 to English language                                                         |
| 3. | Duplicates removed from #2                                                           |
| 4. | [Out of hours OR Out-of-hours] AND [Primary care AND impact]                         |

|     |                                                                  |
|-----|------------------------------------------------------------------|
| 5.  | Limit #4 to English language                                     |
| 6.  | Duplicates removed from #5                                       |
| 7.  | [Out of hours OR Out-of-hours] AND [General practice AND impact] |
| 8.  | Limit #7 to English language                                     |
| 9.  | Duplicates removed from #8                                       |
| 10. | Primary care AND Urgent care AND Models of care                  |
| 11. | Limit #10 to English language                                    |
| 12. | Duplicates removed from #11                                      |
| 13. | #3 AND #6 AND #9 AND #12                                         |
| 14. | Duplicates removed from #13                                      |
